# Supplementary material
Source: PubMed Central journal article supplement (PMC5222777)

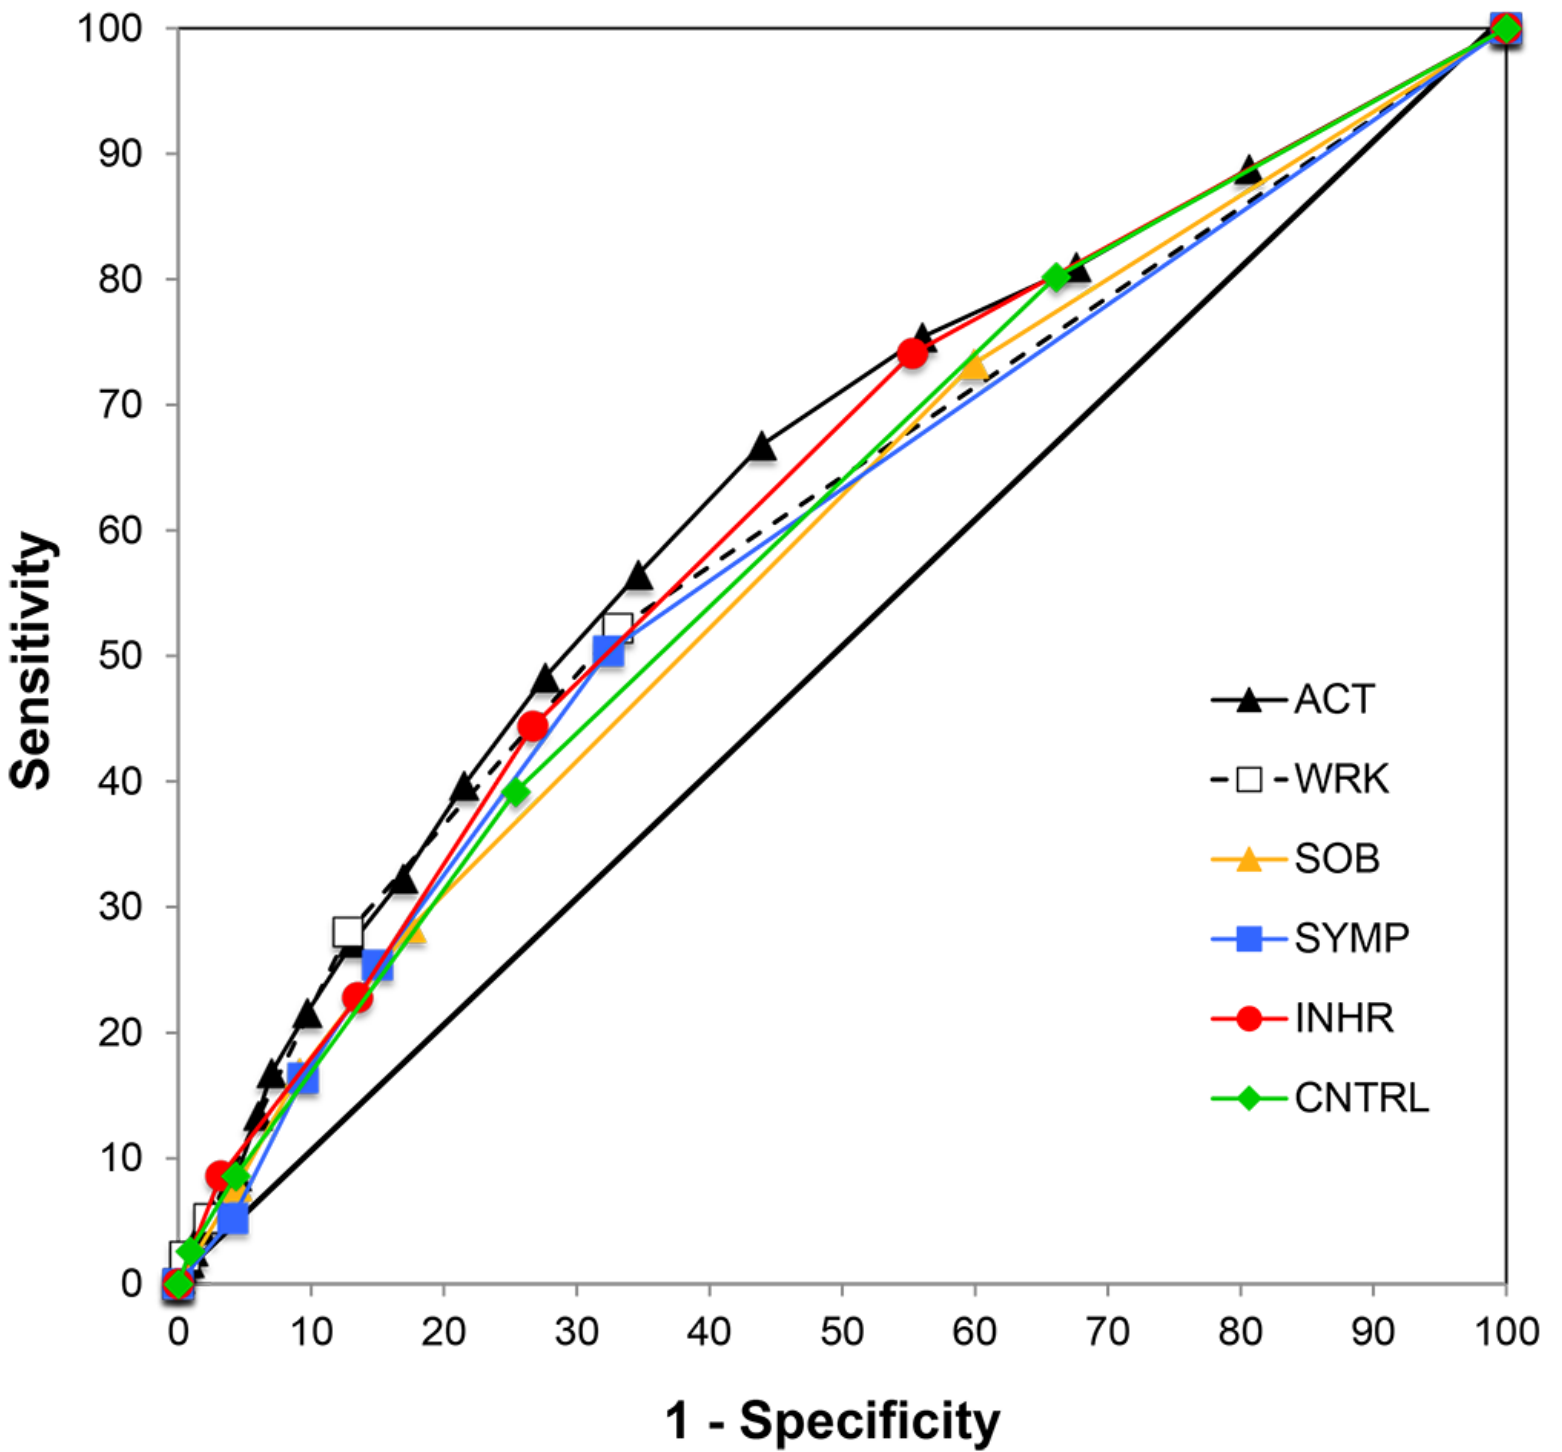

Supplement: NIHMS802809-supplement-supplement_1.pdf [file NIHMS802809-supplement-supplement_1.pdf]
